# Supplementary material for: Efficacy and Safety of the Combination of Pravastatin and Sorafenib for the Treatment of Advanced Hepatocellular Carcinoma (ESTAHEP Clinical Trial)
Source: PubMed Central journal article supplement (PMC7409102; doi:10.3390/cancers12071900), 2020-07-14
Supplement: cancers-12-01900-s001.pdf [file cancers-12-01900-s001.pdf]

# Supplementary Materials: Efficacy and Safety of the Combination of Pravastatin and Sorafenib for the Treatment of Advanced Hepatocellular Carcinoma (ESTAHEP Clinical Trial)

Ioana Riaño, Leticia Martín, Maria Varela, Trinidad Serrano, Oscar Núñez, Beatriz Mínguez, Pedro M. Rodrigues, Maria J. Perugorria, Jesus M. Banales and Juan I. Arenas

**Table S1.** Summary of survival results for the main variables.

| Population                                                          | Variable                            | <i>n</i>      | Mean Survival (Months) | Median Survival (Months) | <i>p</i> Value |
|---------------------------------------------------------------------|-------------------------------------|---------------|------------------------|--------------------------|----------------|
| Total population                                                    | Overall survival                    | 31            | 11.5                   | 12.4                     | na             |
|                                                                     | Time to progression                 | 28            | 7.6                    | 7.5                      | na             |
|                                                                     | Time to symptomatic progression     | 31            | 6.2                    | 4.6                      | na             |
|                                                                     | Treatment days: <129 vs. ≥129 days  | 15; 16        | 8.2 vs. 14.6           | 6.3 vs. 14.8             | 0.003          |
|                                                                     | Child-Pugh stage: A vs. B           | 28; 3         | 12.3 vs. 4.4           | 14.0 vs. 6.0             | 0.007          |
|                                                                     | Vascular invasion: YES vs. NO       | 13; 18        | 8.6 vs. 13.6           | 6.3 vs. 14.8             | 0.041          |
|                                                                     | Portal vein thrombosis: YES vs. NO  | 11; 20        | 8.5 vs. 13.1           | 6.3 vs. 14.8             | 0.026          |
|                                                                     | Etiology HCV vs. HBV vs. Alcohol    | 16; 3; 16     | 11.0 vs. 8.0 vs. 12.0  | 11.6 vs. 8.2 vs. 14.0    | nd             |
|                                                                     | Tumoral response: PR vs. SD vs. PD  | 2; 11; 15     | 18 vs. 9.2 vs. 13.8    | 18 vs. 6.3 vs. 14.8      | 0.009          |
|                                                                     | Dermatological toxicity: YES vs. NO | 16; 15        | 13.6 vs. 9.3           | 14.5 vs. 6.9             | 0.049          |
| Treatment groups:<br>sorafenib+placebo vs.<br>sorafenib+pravastatin | Overall survival:                   |               |                        |                          |                |
|                                                                     | sor+plac vs. sor+prav               | 16; 15        | 11.4 vs. 11.6          | 11.6 vs. 12.4            | 0.922          |
|                                                                     | Survival at the end of treatment:   |               |                        |                          |                |
|                                                                     | sor+plac vs. sor+prav               | 16; 15        | 6.1 vs. 8.6            | 3.2 vs. 9.7              | 0.188          |
|                                                                     | TTP: sor+plac vs. sor+prav          | 16; 15        | 4.3 vs. 9.8            | 3.2 vs. 9.9              | 0.008          |
|                                                                     | TTSP: sor+plac vs. sor+prav         | 16; 15        | 5.1 vs. 7.4            | 3.7 vs. 4.6              | 0.393          |
|                                                                     | Portal vein thrombosis YES:         |               |                        |                          |                |
|                                                                     | sor+plac vs. sor+prav               | 6; 5          | 6.75 vs. 10.6          | 6.0 vs. 8.2              | 0.301          |
| Dose reduction NO:                                                  |                                     |               |                        |                          |                |
| sor+plac vs. sor+prav                                               | 11; 10                              | 10.9 vs. 12.1 | 11.6 vs. 12.4          | 0.705                    |                |

HCV: hepatitis C virus; HBV: hepatitis B virus; PR, partial response; SD, stable disease; PD, progressive disease; sor, sorafenib; prav, pravastatin; TTP, time to progression; TTSP, time to symptomatic progression; na, not applicable; nd, not determined.

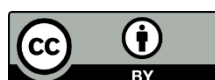

© 2020 by the authors. Submitted for possible open access publication under the terms and conditions of the Creative Commons Attribution (CC BY) license (<http://creativecommons.org/licenses/by/4.0/>).
